# Supplementary material
Source: publisher figshare collection journal article supplement (https://gsapubs.figshare.com/ndownloader/files/25883751)
Supplement: Supplementary file 1 [file 25883751]

## Sheet: Sheet1
	Table S2. Linear regression model results, using a latitudinal gradient threshold of -0.4 °C °latitude-1.
	Temperature Analysis Window	Number of Additional Temperatures	Mean SA Slope	Mean TZ Slope	Results on the Null Hypothesis that Mean SA Slope minus Mean BZ Slope = 0
					Difference			Null Hypothesis Supported at the 1% significane level?	p-value	t-statistic
					Mean	99% CI Min	99% CI Max
	78 to 74 Ma	5	-0.3615	-1.1623	0.8008	0.7714	0.830266	No	0	70.1298
		10	-0.3496	-1.1493	0.7997	0.767068	0.832323	No	0	63.174
		15	-0.3578	-1.2	0.8422	0.808077	0.876394	No	0	63.5516
		20	-0.3658	-1.2745	0.9087	0.87052	0.946828	No	0	61.3846
	71 to 69 Ma	5	-0.3875	-1.097	0.7095	0.683912	0.734992	No	0	71.5969
		10	-0.368	-1.1457	0.7777	0.750154	0.805206	No	0	72.8199
		15	-0.3581	-1.1711	0.813	0.783979	0.842003	No	0	72.2274
		20	-0.3564	-1.2213	0.8649	0.83285	0.896945	No	0	69.5613
	69 to 66 Ma	5	-0.3675	-1.3133	0.9458	0.916874	0.974744	No	0	84.246
		10	-0.3502	-1.2813	0.9311	0.896958	0.965333	No	0	70.198
		15	-0.3402	-1.2926	0.9524	0.915364	0.989475	No	0	66.2439
		20	-0.3375	-1.2338	0.8963	0.857192	0.935461	No	0	59.0311
